# Supplementary material for: Structure of 3′-PO4/5′-OH RNA ligase RtcB in complex with a 5′-OH oligonucleotide
Source: PubMed Central journal article supplement — RNA. 2021 May;27(5):584–90. doi: 10.1261/rna.078692.121 (PMC8051266; doi:10.1261/rna.078692.121), 2021-05
Supplement: supp_078692.121_Supplemental_FigS1_TableS1.pdf [file supp_078692.121_Supplemental_FigS1_TableS1.pdf]

## Supplemental Data

### Structure of 3'-PO<sub>4</sub>/5'-OH RNA ligase RtcB in complex with a 5'-OH oligonucleotide

Ankan Banerjee, Yehuda Goldgur, and Stewart Shuman

Table S1. Crystallographic data and refinement statistics

|                                                                     | <b>RtcB•DNA complex</b>          |
|---------------------------------------------------------------------|----------------------------------|
| <b>Data collection</b>                                              |                                  |
| Beamline                                                            | APS 24-ID-E                      |
| Space group                                                         | P4 <sub>3</sub> 2 <sub>1</sub> 2 |
| Cell dimensions<br>a, b, c (Å)<br>$\alpha$ , $\beta$ , $\gamma$ (°) | 151.4, 151.4, 82.3<br>90, 90, 90 |
| Resolution (Å)                                                      | 50–2.70 (2.75–2.70)              |
| Wavelength (Å)                                                      | 0.9792                           |
| R <sub>pim</sub>                                                    | 0.026 (0.411)                    |
| CC1/2                                                               | 0.998 (0.743)                    |
| $\langle I \rangle / \langle \sigma \rangle$                        | 31.7 (2.1)                       |
| Completeness (%)                                                    | 100.0 (100.0)                    |
| Redundancy                                                          | 10.9 (11.1)                      |
| Unique reflections                                                  | 26812                            |
| <b>Refinement</b>                                                   |                                  |
| R <sub>work</sub> / R <sub>free</sub>                               | 0.191 / 0.216 (0.303 / 0.317)    |
| B-factors (Å <sup>2</sup> )<br>Average/Wilson                       | 70.1 / 64.3                      |
| RMS deviations<br>bond lengths (Å)<br>bond angles (°)               | 0.011<br>1.351                   |
| Ramachandran plot<br>% favored<br>% allowed<br>outliers             | 95.4<br>4.6<br>0                 |
| <b>Model contents</b>                                               |                                  |
| Protomers / ASU                                                     | 1                                |
| Protein residues                                                    | 480                              |
| Nucleotides                                                         | 6                                |
| Water molecules                                                     | 17                               |
| Ions                                                                | 2                                |
| <b>PDB ID</b>                                                       | 7LFQ                             |

Values in parentheses refer to the highest resolution shell.

R<sub>free</sub> set consists of 7.5% reflections chosen randomly against which the structure was not refined.

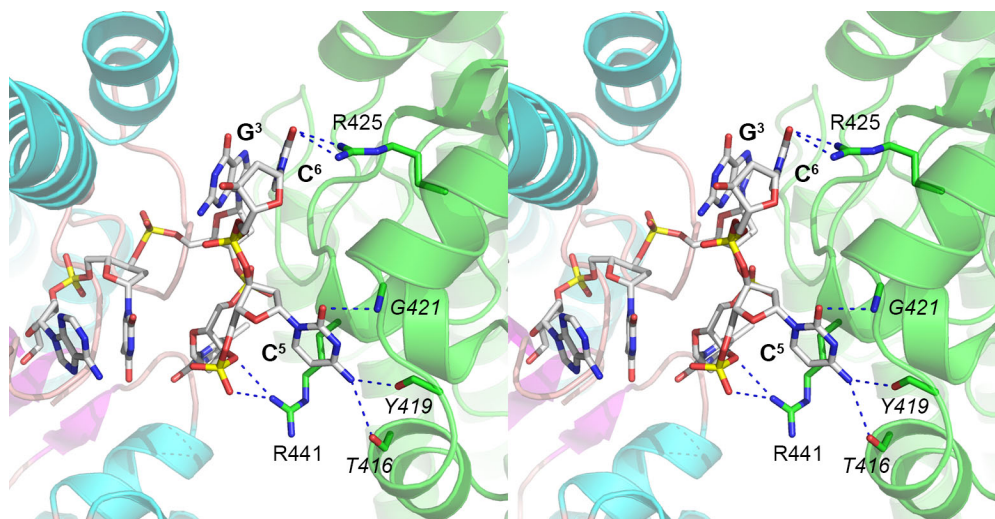

Figure S1. The distal segment of the 5'-OH strand contacts a symmetry-related RtcB protomer. Stereo view of the  $\text{HOA}^1\text{pT}^2\text{pG}^3\text{pT}^4\text{pC}^5\text{pC}^6$  strand with its 5'-OH end in the active site of the RtcB protomer at left (cartoon model colored by secondary structure) highlighting an interface of the distal nucleotides with a symmetry-related RtcB protomer in the crystal lattice (green cartoon model). Hydrogen bonds to the oligonucleotide from the symmetry-related RtcB side chains (labeled in plain font) and main chains (labeled in *italics*) are denoted by blue dashed lines.
